# Supplementary material
Source: publisher figshare collection journal article supplement (https://acs.figshare.com/ndownloader/files/5467517)
Supplement: Supplementary file 1 [file 5467517]

Supporting information for

# Simple, Effective Molecular Strategy for the Design of Fuel Cell Membranes: Combination of Perfluoroalkyl and Sulfonated Phenylene Groups

Takashi Mochizuki,<sup>†</sup> Makoto Uchida,<sup>‡</sup> and Kenji Miyatake,<sup>\*,‡,§</sup>

<sup>†</sup>*Interdisciplinary Graduate School of Medicine and Engineering*, <sup>‡</sup>*Fuel Cell Nanomaterials Center*,  
and <sup>§</sup>*Clean Energy Research Center*,  
*University of Yamanashi, 4 Takeda, Kofu, Yamanashi 400-8510, Japan*

**\*Corresponding Author**

E-mail address: miyatake@yamanashi.ac.jp

## Experimental

### 1. Materials

Perfluoro-1,6-diiodohexane (TCI), 1-chloro-3-iodobenzene (TCI), copper (Cu) powder (particle size 75 - 150  $\mu\text{m}$ , Kanto Chemical), dimethylsulfoxide (DMSO) (Kanto Chemical), 1,3-dichlorobenzene (TCI), 1,4-dichlorobenzene (TCI), 2,2-bipyridine (TCI), bis(1,5-cyclooctadiene)nickel(0) ( $\text{Ni}(\text{COD})_2$ ) (Kanto Chemical), N,N-dimethylacetamide (DMAc) (Kanto Chemical), and 30% oleum (Kanto Chemical) were used as received. Other chemicals were of commercially available grade and used as received. Precursor copolymer, poly(phenylene-*ran*-perfluorohexylene) (PAF) **1** with copolymer composition of  $n/m = 0.48$  and  $o/m = 0.62$  was prepared according to the literature (Scheme 1a).<sup>1</sup>

### 2. Sulfonation of **1** and membrane preparation

To a 100 mL of round-bottomed flask, **1** (3.7 mmol, 2.0 g) and 30% oleum (36 mL) were charged. The mixture was stirred at room temperature for 72 h. The resulting brown mixture was poured into a large excess of ice-cold deionized water. The precipitate was washed in deionized water and dried at 80 °C in vacuum oven overnight to obtain a sulfonated PAF (SPAF) **2** as a brown powder in 77% yield. A solution of polymer **2** (ca. 0.4 g) in DMSO (ca. 11 mL) was cast onto a leveled glass plate. Heating the solution at 80 °C overnight gave a ca. 28  $\mu\text{m}$  thick, transparent and bendable membrane. The membrane was treated with 1 M  $\text{H}_2\text{SO}_4$  for 24 h at room temperature, washed with deionized water several times, and dried at room temperature.

### 3. Measurements

Molecular weight of the oligomers and polymers was measured with gel permeation chromatography (GPC) using a Jasco 875 UV detector and a Jasco 805 UV detector for oligomers and polymers, respectively. The eluent was DMF containing 0.01 M LiBr. A Shodex K-805L column was used for oligomers and polymers. Molecular weight was calibrated with standard polystyrene samples.  $^1\text{H}$  and  $^{19}\text{F}$  NMR spectra were obtained on a JEOL JNM-ECA 500 using deuterated dimethyl sulfoxide ( $\text{DMSO}-d_6$ ) as a solvent and tetramethylsilane (TMS) as an internal reference. Ion exchange capacity (IEC) of the membranes was measured by back-titration. A piece of the membranes (ca. 20 mg) was equilibrated in 10 mL of saturated aqueous NaCl solution for 12 h. The released HCl by the ion exchange was titrated with standard 0.01 M aqueous NaOH solution.

Morphology of the membranes was analyzed by transmission electron microscopy (TEM) and small-angle X-ray scattering (SAXS). For TEM observation, the membrane samples were stained with lead ( $\text{Pb}^{2+}$ ) ions by ion exchange of the sulfonic acid groups in 0.5 M lead acetate aqueous solution, rinsed with deionized water, and dried in vacuum oven for 12 h. The stained samples were embedded in epoxy resin, sectioned to 50 nm thickness, and placed on copper grids. Images were taken using a Hitachi H-9500 at the acceleration voltage of 200 kV. SAXS experiments were

performed using a Rigaku NANO-Viewer equipped with a temperature/humidity controlled chamber. The X-ray wavelength was  $\lambda = 0.154$  nm and the scattering patterns were collected using a Rigaku high speed 2D detector PILATUS 100K/R. The range of the scattering vector,  $q = 4\pi\sin(\theta/2)/\lambda$ , was from 0.05 to 3 nm<sup>-1</sup> (ca. 2 - 120 nm), where  $\theta$  is the scattering angle. The temperature was set at 80 °C, while the humidity was controlled from 30% to 90% RH under nitrogen atmosphere. The membranes were equilibrated for at least 2 h under each RH condition. Water uptake and proton conductivity of the membranes were measured with a solid electrolyte analyzer system (MSBAD-V-FC, Bel Japan Co.) at 80 °C with varying humidity from 20% to 95% RH (relative humidity). Dynamic mechanical analysis (DMA) of SPAF membrane (0.5 cm × 3 cm) was carried out in a chamber at 80 °C with varying humidity. These properties of the SPAF ionomer membrane was compared with those of the aromatic block copolymer, SPP (Figure S1, IEC = 2.67 meq g<sup>-1</sup>, ca. 29 μm thick, synthesized in-house)<sup>2</sup> and Nafion NRE211 (IEC = 0.91 meq g<sup>-1</sup>, ca. 25 μm thick, Du Pont).

#### 4. Preparation of catalyst-coated membranes (CCMs)

A catalyst paste was prepared by mixing Pt/CB catalyst (TEC10E50E, Tanaka Kikinzoku Kogyo K. K.), Nafion dispersion (IEC = 0.95-1.03 meq g<sup>-1</sup>, D-521, Du Pont), deionized water and ethanol by ball milling for 30 min. The mass ratio of Nafion ionomer to the carbon support (I/C) was adjusted to 0.7. The CCMs were dried at 60 °C for 6 h and hot-pressed at 140 °C and 1.0 MPa for 3 min. The geometric area and the Pt loading amount of the catalyst layer (CL) were 29.2 cm<sup>2</sup> and 0.50 mg cm<sup>-2</sup>, respectively. The catalyst-coated membranes (CCMs) were prepared with spraying the catalyst paste on both sides of the three ionomer membranes (NRE211, SPP, and SPAF) by pulse swirl spray (PSS) technique. The CCMs were sandwiched by two gas diffusion layers (GDL, 25BCH, SGL Carbon Group Co., Ltd.) and mounted into a Japan Automobile Research Institute (JARI) standard single cell, which has serpentine flow channels on both the anode and the cathode sides. The cell compression was 1.0 MPa. The cells using the NRE211, SPP, and SPAF are denoted as the NRE211-cell, SPP-cell, and SPAF-cell, respectively.

#### 5. Fuel cell operation

The electrochemically active surface area (ECSA) of the Pt catalyst at the cathode was estimated by cyclic voltammetry at 80 °C at 30%, 53%, 80%, and 100% RH using a potentiostat (PGST30 Autolab System, Eco-Chemie). Prior to the cyclic voltammogram measurements, hydrogen (100 mL min<sup>-1</sup>) and nitrogen (150 mL min<sup>-1</sup>) were supplied to the anode and the cathode, respectively. Before the potential sweep, the cathode potential was maintained at 0.07 V for 3 s. Then, the nitrogen flow was stopped, and the potential was swept from 0.07 to 1.0 V at a sweep rate of 20 mV s<sup>-1</sup>. The ECSA values were calculated from the hydrogen adsorption charge in the negative-going potential scan, referred to  $\Delta Q_H^0 = 0.21$  mC cm<sup>-2</sup>, adopted conventionally for clean polycrystalline platinum.<sup>3</sup> Linear sweep voltammetry (LSV) was measured to evaluate the permeability of hydrogen gas from the

anode to the cathode through the ionomer membranes. LSV measurement was carried out at 80 °C at 30, 53, 80, and 100% RH. Prior to the LSV measurements, hydrogen (100 mL min<sup>-1</sup>) and nitrogen (150 mL min<sup>-1</sup>) were supplied to the anode and the cathode, respectively. The cathode potential was swept from 0.15 to 0.6 V at a sweep rate of 0.5 mV s<sup>-1</sup>.

To evaluate the cell performance, the polarization curves were measured at 80 °C and 30%, 53%, 80%, and 100% RH. Pure hydrogen and air were supplied to the anode and the cathode, respectively. The gas utilizations at the anode and the cathode were 70% and 40%, respectively. The high frequency resistance (HFR) of the cell was measured with an AC milliohmmeter (Model 3356 Tsuruga Electric Corporation) at 1.0 kHz. The open circuit voltage (OCV) hold test was carried out under at 80 °C and 30% RH. Pure hydrogen and air at a gas flow rate of 100 mL min<sup>-1</sup> were supplied to the anode and the cathode, respectively. The OCV hold test was continued for 1000 h.

## References

- (1) Ono, H.; Miyake, J.; Shimada, S.; Uchida, M.; Miyatake, K. Anion Exchange Membranes Composed of Perfluoroalkylene Chains and Ammonium-Functionalized Oligophenylenes. *J. Mater. Chem. A* **2015**, *3*, 21779-21788.
- (2) Miyake, J.; Mochizuki, T.; Miyatake, K. Effect of the Hydrophilic Component in Aromatic Ionomers: Simple Structure Provides Improved Properties as Fuel Cell Membranes. *ACS Macro Lett.* **2015**, *4*, 750-754.
- (3) Carter, R. N.; Brady, B. K.; Subramanian, K.; Tighe, T.; Gasteiger, H. A. Spatially Resolved Electrode Diagnostic Technique for Fuel Cell Applications. *ECS Transactions* **2007**, *11*, 423-433.

**Table S1** Molecular weight and ion exchange capacity (IEC) of the PAF and SPAF copolymers.

|      | $M_n^a$ (kDa) | $M_w^a$ (kDa) | IEC <sup>b</sup> (meq g <sup>-1</sup> ) | IEC <sup>c</sup> (meq g <sup>-1</sup> ) | DS <sup>d</sup> |
|------|---------------|---------------|-----------------------------------------|-----------------------------------------|-----------------|
| PAF  | 18.1          | 85.9          | -                                       | -                                       | -               |
| SPAF | 96.1          | 856           | 3.95                                    | 1.59                                    | 0.32            |

<sup>a</sup>Determined by GPC analyses (calibrated with standard polystyrene samples). <sup>b</sup>Calculated from the feed comonomer ratio and 100% degree of sulfonation per phenylene group (one sulfonic acid per phenylene ring). <sup>c</sup>Determined by the titrated IEC value. <sup>d</sup>Degree of sulfonation; Number of sulfonic acid per phenylene.

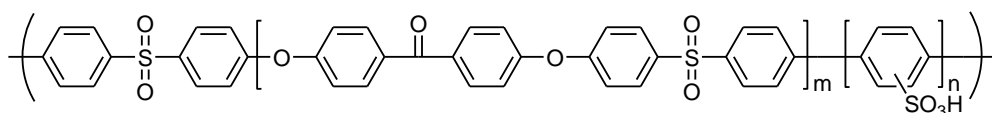**Figure S1.** Molecular structure of the SPP copolymer.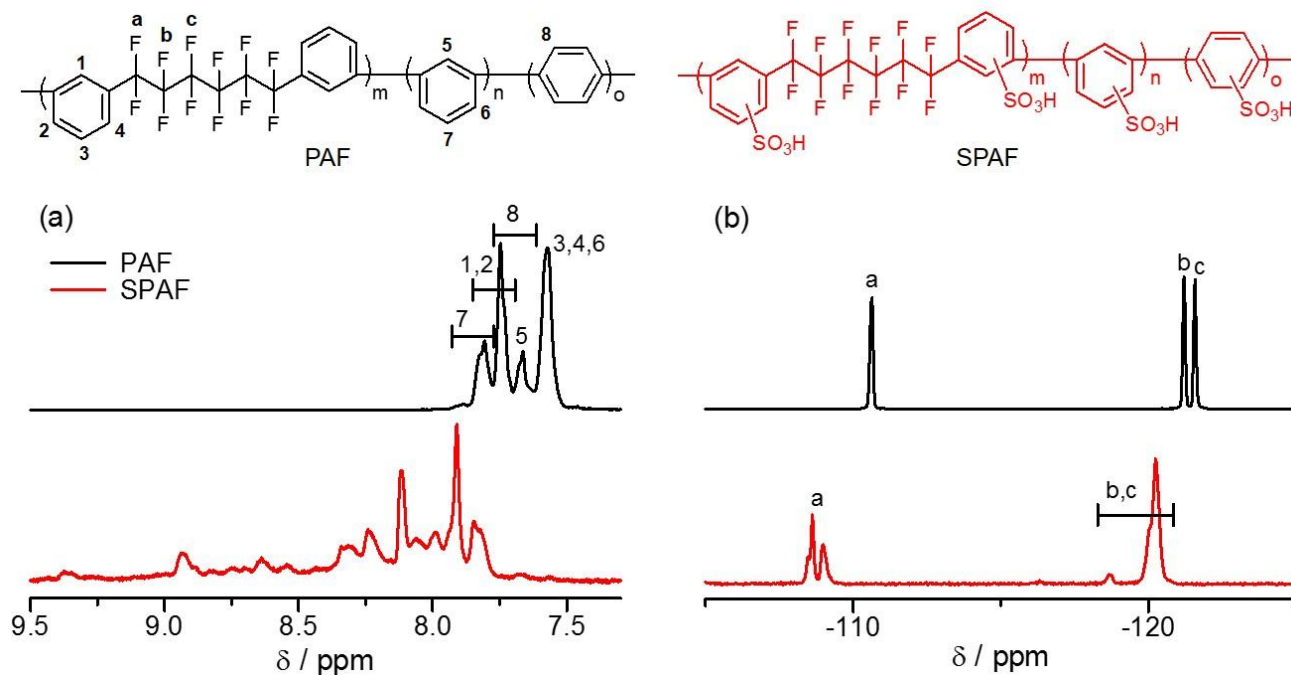**Figure S2.** (a) <sup>1</sup>H and (b) <sup>19</sup>F NMR spectra of the PAF and SPAF copolymers.

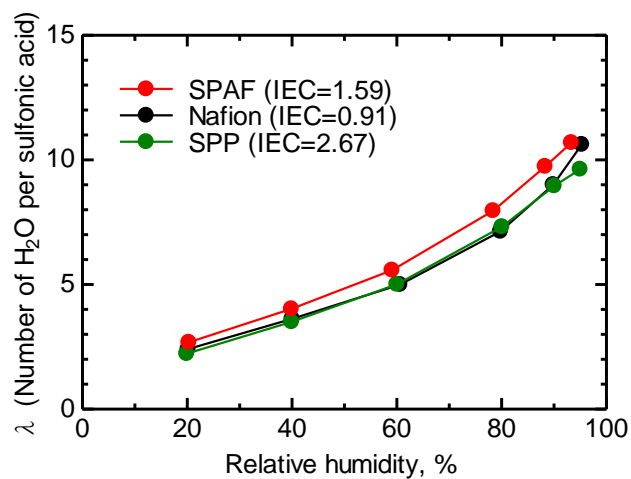

**Figure S3.** Number of absorbed water molecules per sulfonic acid group ( $\lambda$ ) of the ionomer membranes as a function of relative humidity at 80 °C.

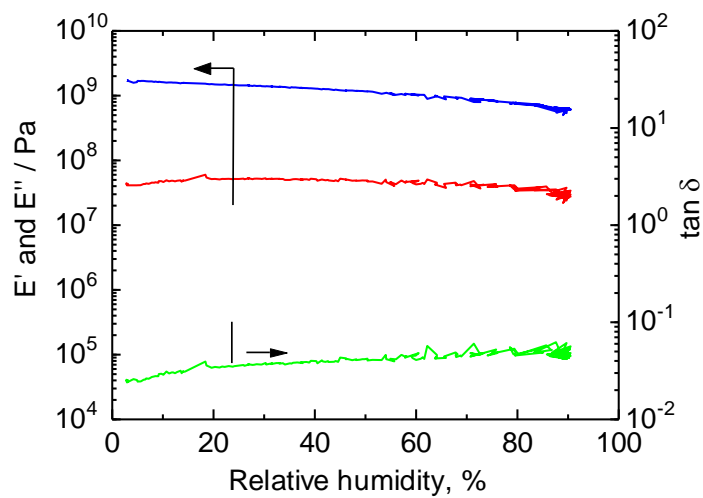

**Figure S4.** Storage moduli ( $E'$ ), loss moduli ( $E''$ ), and  $\tan \delta$  ( $= E''/E'$ ) curves of SPAF membrane as a function of relative humidity at 80 °C.

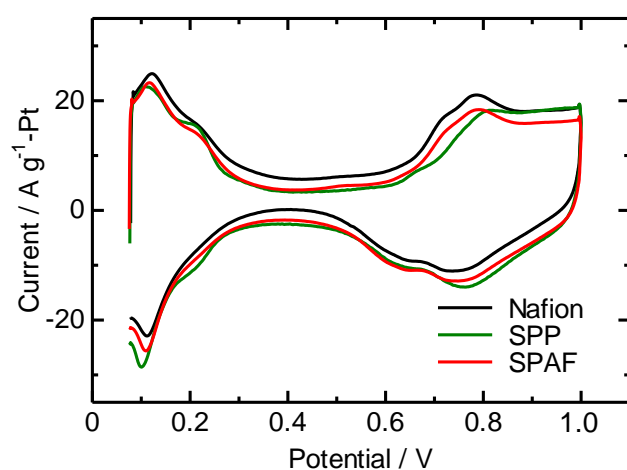

**Figure S5.** Cyclic voltammograms of the Nafion-, SPP-, and SPAF-cells at 80 °C and 100% RH.

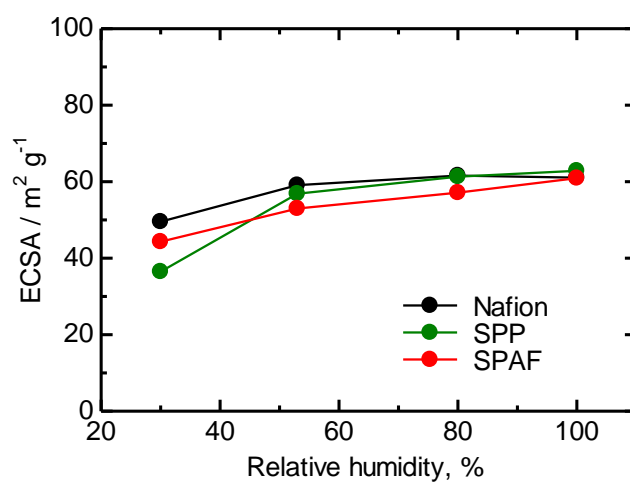

**Figure S6.** Electrochemically active surface area (ECSA) of the Nafion-, SPP-, SPAF-cells at 80 °C as a function of relative humidity.

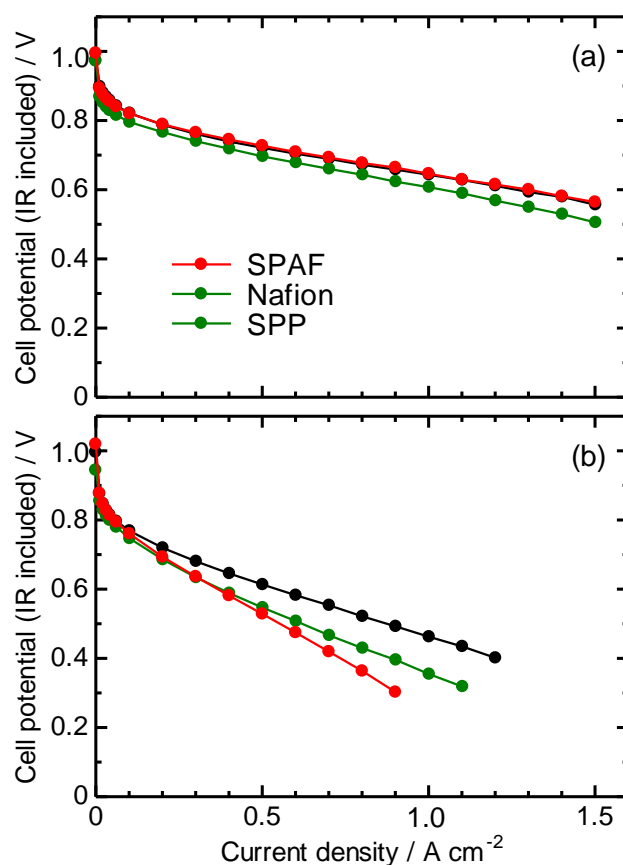

**Figure S7.** *IR*-included polarization curves of the Nafion-, SPP-, and SPAF-cells at 80 °C and (a) 100%, (b) 30% RH.

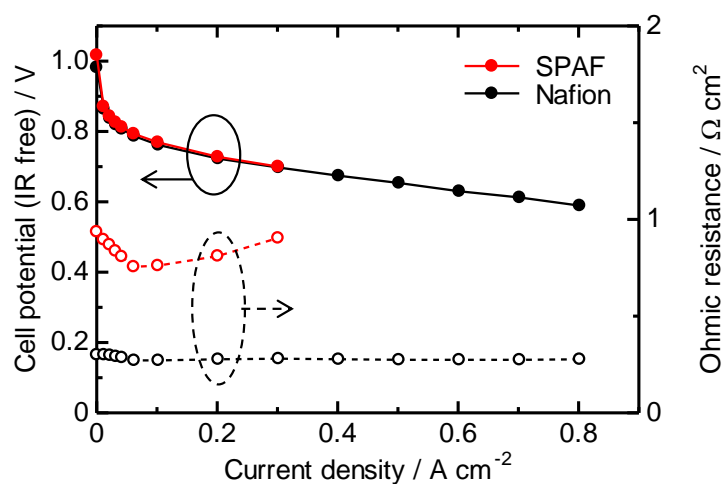

**Figure S8.** *IR*-corrected polarization curves of the Nafion- and SPAF-cells at 100 °C and 30% RH.



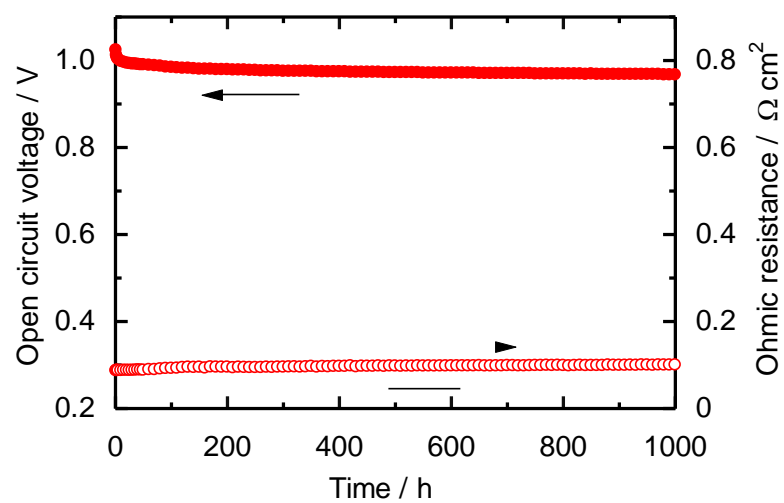

**Figure S9.** OCV hold test of SPAF membrane at 80 °C and 30% RH.
